# Supplementary material
Source: Springer Nature journal article supplement (https://www.springermedizin.de/resource/supplementary/13063_2011_726_MOESM1_ESM.pdf/9618568)
Supplement: MOESM1 [file 9618568]

Perforated  
diverticulitis  
requiring acute  
surgery

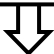

Diagnostic  
laparoscopy in  
all four  
quadrants

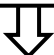

Hinchey III  
(N=80)  
**Include &  
Randomise**

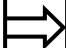

Hinchey I, II,  
IV or other  
pathology  
**Exclude**

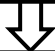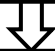

Laparoscopic  
Lavage  
(N=40)  
•Lavage with >3L  
of saline or return  
of clear fluid  
•Passive drainage  
for at least 24h  
•Continued  
antibiotics

Hartman  
Procedure  
(N=40)  
•Sigmoid resection  
and colostomy  
•Passive drainage  
for at least 24h  
•Continued  
antibiotics

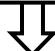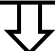

Follow-Up  
6-12 weeks  
6 months  
12 months
